# Supplementary material for: A vertically channeled lamellar membrane for molecular sieving of water from organic solvents
Source: Royal Society of Chemistry journal article supplement (doi:10.1039/c8ta04095h), 2018-01-01
Supplement: c8ta04095h1.pdf [file c8ta04095h1.pdf]

## Electronic Supplementary Information

**A vertically channeled lamellar membrane for molecular sieving of water from organic solvent**

*Xiaoting Li, Naixin Wang\*, Zheng Huang, Lilong Zhang, Ya-Bo Xie, Quan-Fu An, Shulan Ji*

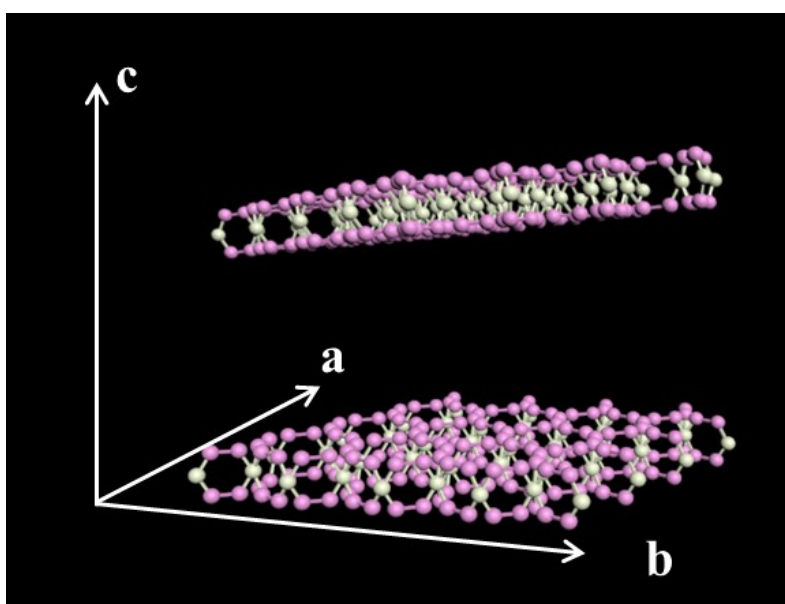

**Figure S1.** Structure of LDHs with reference.

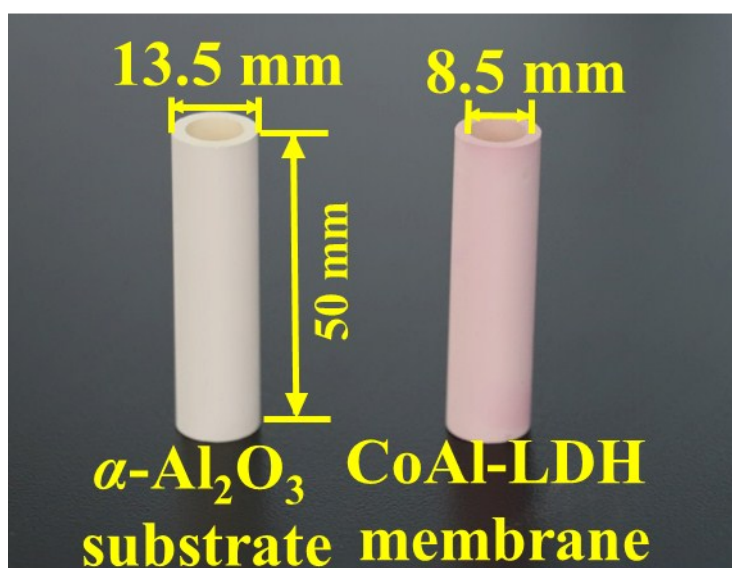

**Figure S2.** The photo of the  $\alpha$ -Al<sub>2</sub>O<sub>3</sub> substrate and the CoAl-LDH membrane.

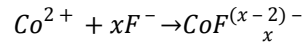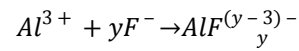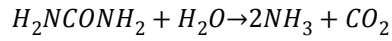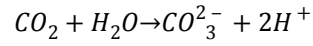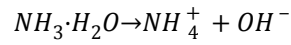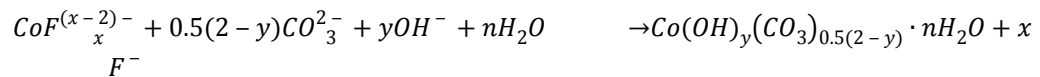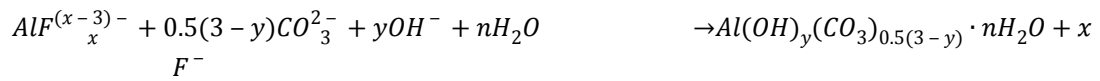

**Figure S3.** The reaction formulas with the assistance of  $F^{-}$  involved in the hydrothermal process.

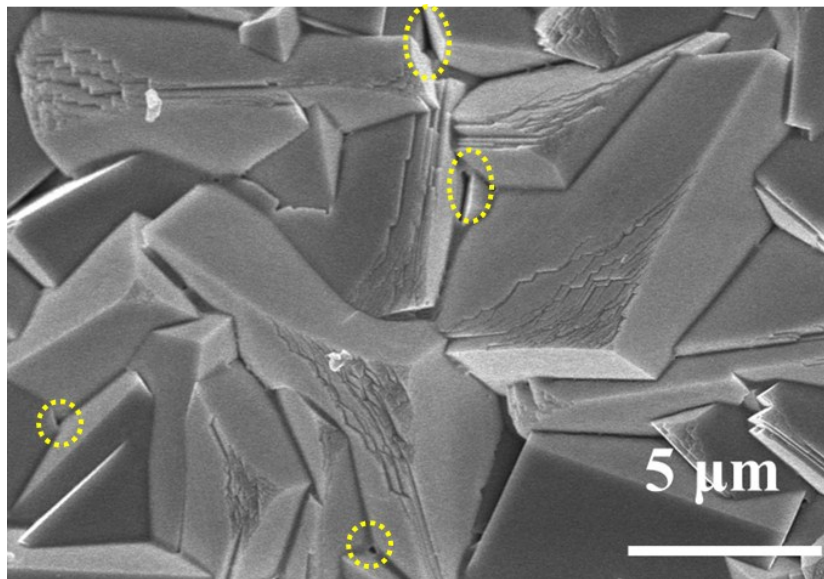

**Figure S4.** Surface morphology of CoAl-LDH composite membranes without  $NH_4F$ .

(Preparation conditions:  $Co(NO_3)_2 \cdot 6H_2O$ , 21 mmol/L;  $Al(NO_3)_3 \cdot 9H_2O$ , 7 mmol/L; urea, 70 mmol/L; and  $NH_4F$ , 100 mmol/L; reaction temperature, 110 °C; reaction time, 24 h)

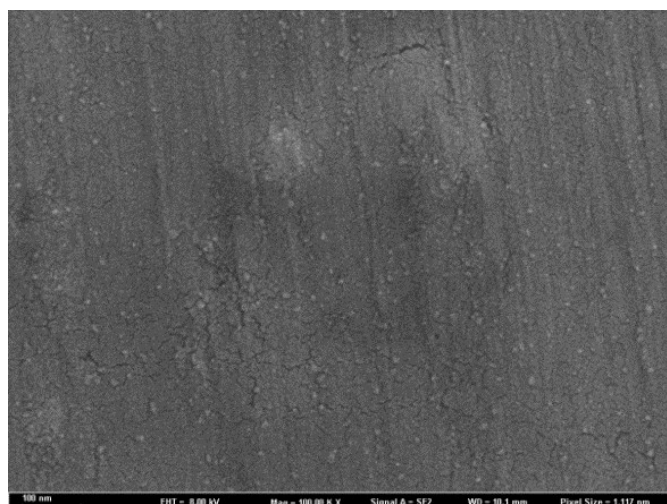

**Figure S5.** Surface morphology of CoAl-LDH composite membranes after wipe off. (Preparation conditions:  $\text{Co}(\text{NO}_3)_2 \cdot 6\text{H}_2\text{O}$ , 21 mmol/L;  $\text{Al}(\text{NO}_3)_3 \cdot 9\text{H}_2\text{O}$ , 7 mmol/L; urea, 70 mmol/L; and  $\text{NH}_4\text{F}$ , 100 mmol/L; reaction temperature, 110 °C; reaction time, 24 h)

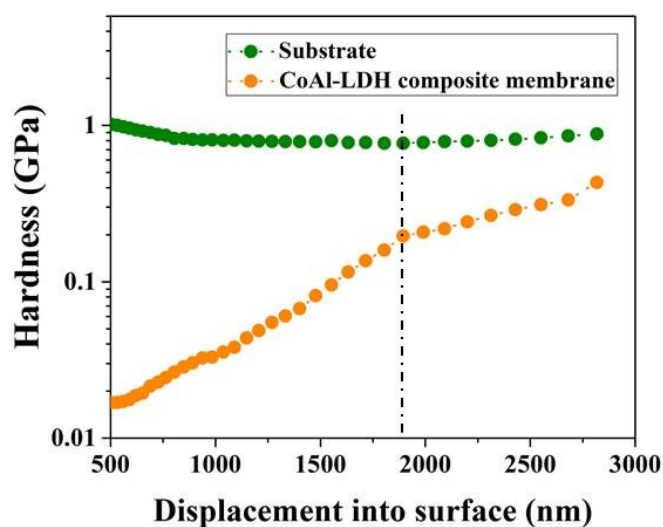

**Figure S6.** Hardness curves of the ceramic substrate and CoAl-LDH composite membrane with displacement into surface. (Preparation conditions:  $\text{Co}(\text{NO}_3)_2 \cdot 6\text{H}_2\text{O}$ , 21 mmol/L;  $\text{Al}(\text{NO}_3)_3 \cdot 9\text{H}_2\text{O}$ , 7 mmol/L; urea, 70 mmol/L; and  $\text{NH}_4\text{F}$ , 100 mmol/L; hydrothermal temperature, 110 °C; hydrothermal time, 24 h)

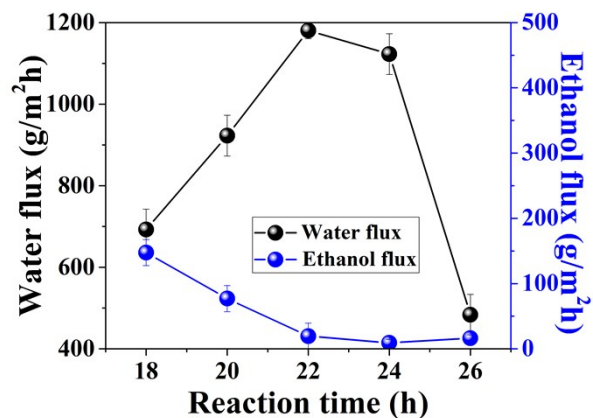

**Figure S7.** Effects of hydrothermal time on ethanol dehydration performance of the CoAl-LDH composite membranes.

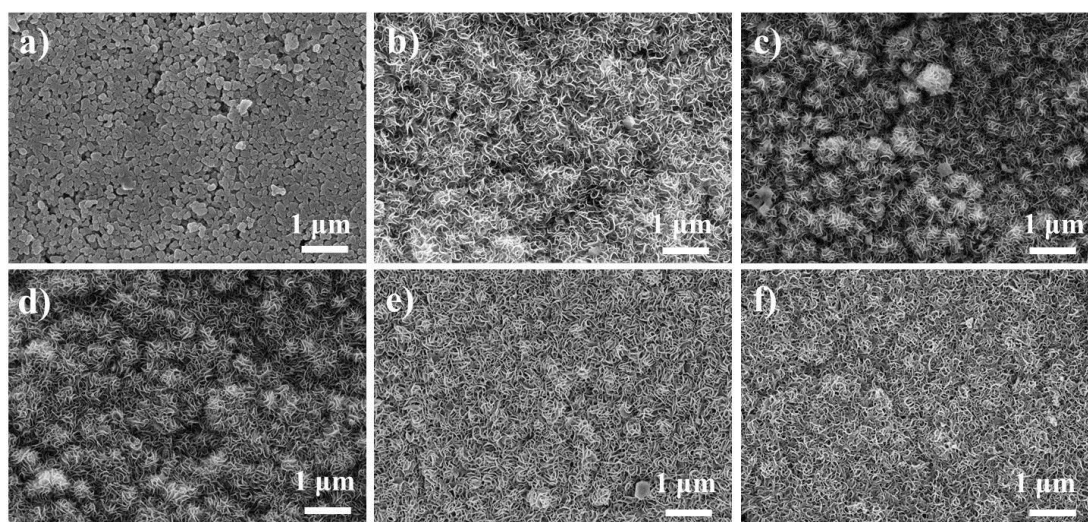

**Figure S8.** Surface SEM images of a) alumina substrate and CoAl-LDH membranes with different hydrothermal time: b) 18 h; c) 20 h; d) 22 h; e) 24 h; f) 26 h.

(Preparation conditions:  $\text{Co}(\text{NO}_3)_2 \cdot 6\text{H}_2\text{O}$ , 18 mmol/L;  $\text{Al}(\text{NO}_3)_3 \cdot 9\text{H}_2\text{O}$ , 6 mmol/L; urea, 60 mmol/L; and  $\text{NH}_4\text{F}$ , 100 mmol/L; hydrothermal temperature, 110 °C)



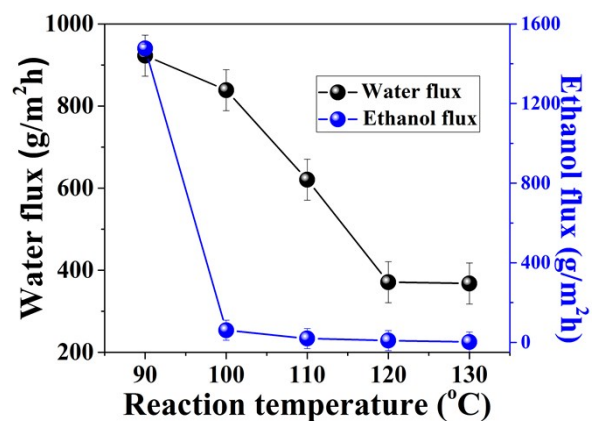

**Figure S9.** Effects of reaction temperature on ethanol dehydration performance of the CoAl-LDH composite membranes.

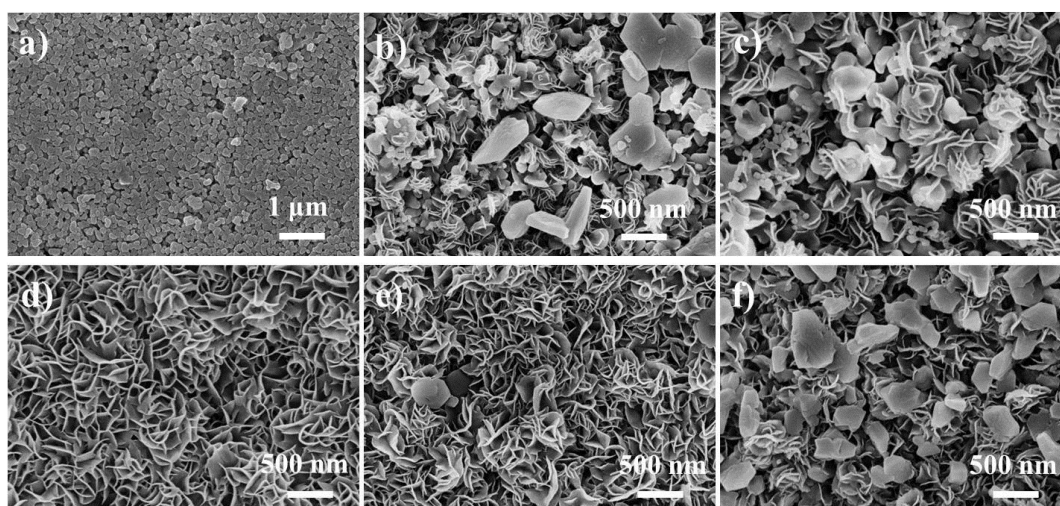

**Figure S10.** Surface SEM images of a) alumina substrate and CoAl-LDH membranes with different hydrothermal temperature: b) 90 °C; c) 100 °C; d) 110 °C; e) 120 °C; f) 130 °C. (Preparation conditions:  $\text{Co}(\text{NO}_3)_2 \cdot 6\text{H}_2\text{O}$ , 18 mmol/L;  $\text{Al}(\text{NO}_3)_3 \cdot 9\text{H}_2\text{O}$ , 6 mmol/L; urea, 60 mmol/L; and  $\text{NH}_4\text{F}$ , 100 mmol/L; hydrothermal time, 24 h)

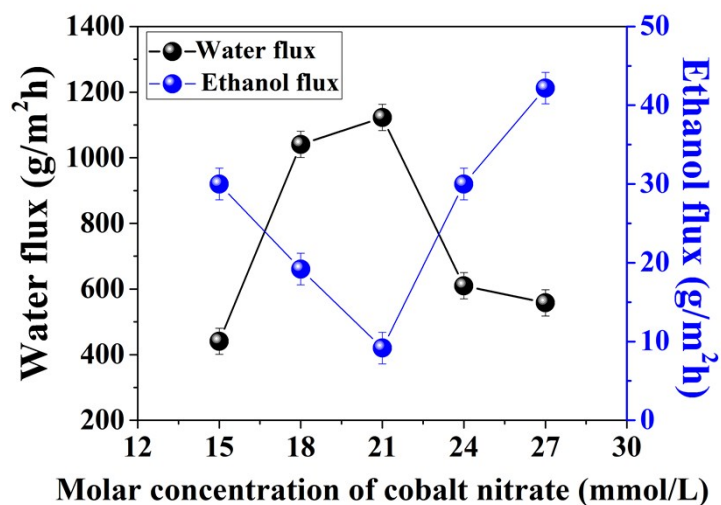

**Figure S11.** Effects of molar concentration of cobalt nitrate on ethanol dehydration performance of the CoAl-LDH composite membranes.

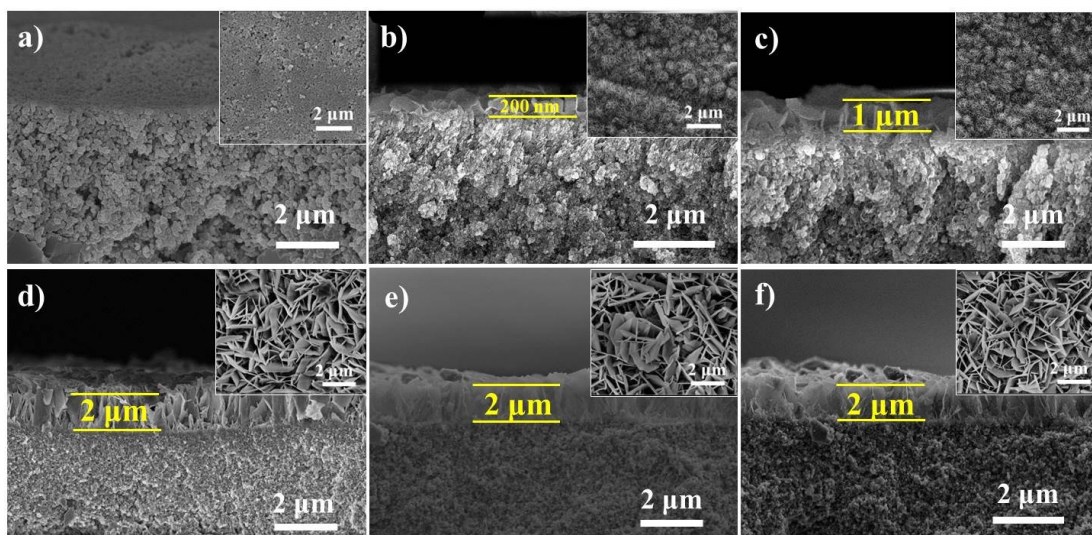

**Figure S12.** Cross-section and surface SEM images of a) alumina substrate and CoAl-LDH membranes with different molar concentration of cobalt nitrate: b) 15 mmol/L; c) 18 mmol/L; d) 21 mmol/L; e) 24 mmol/L; f) 27 mmol/L. (Preparation conditions: hydrothermal temperature, 110 °C; hydrothermal time, 24 h)

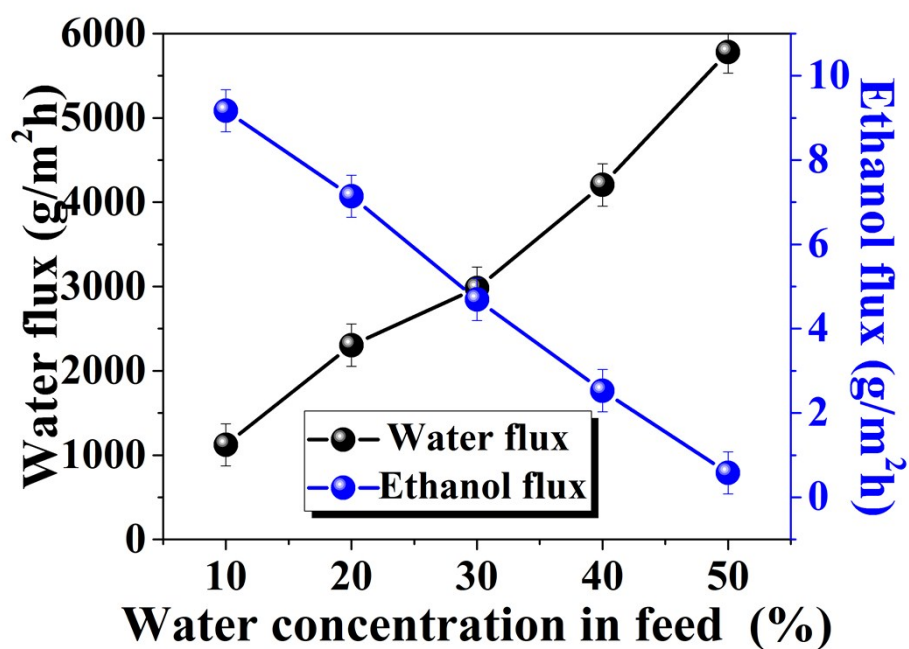

Figure S13. Ethanol dehydration pervaporation performance with water concentration in feed.

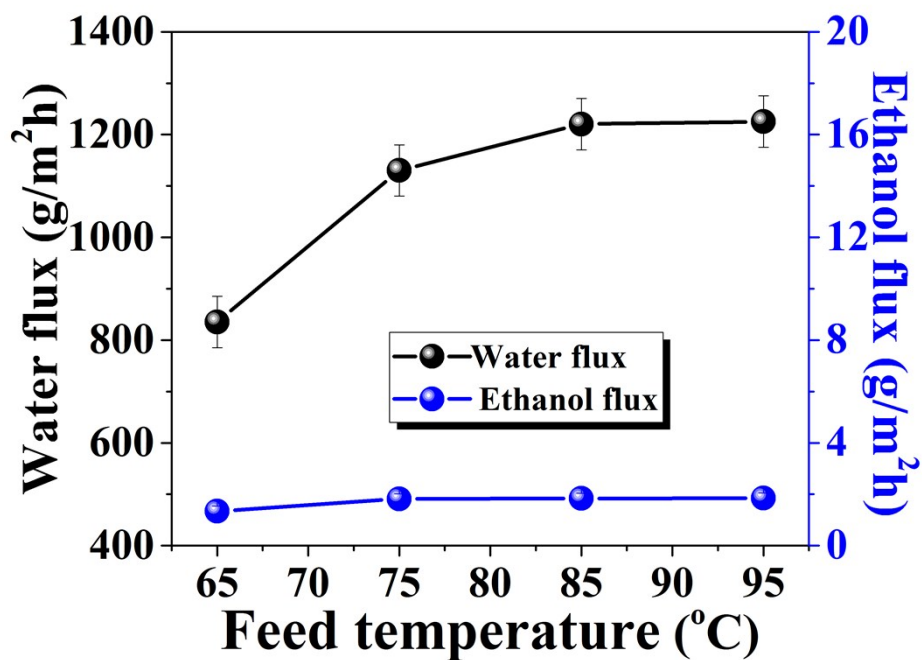

Figure S14. Ethanol dehydration pervaporation performance with feed temperature.

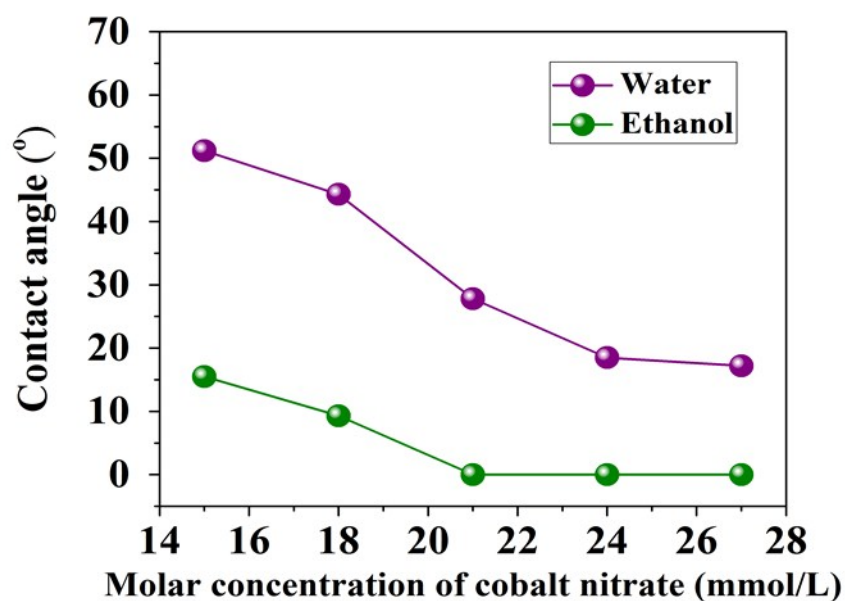

**Figure S15.** Static contact-angle of alumina substrate and CoAl-LDH composite membranes with different molar concentration.

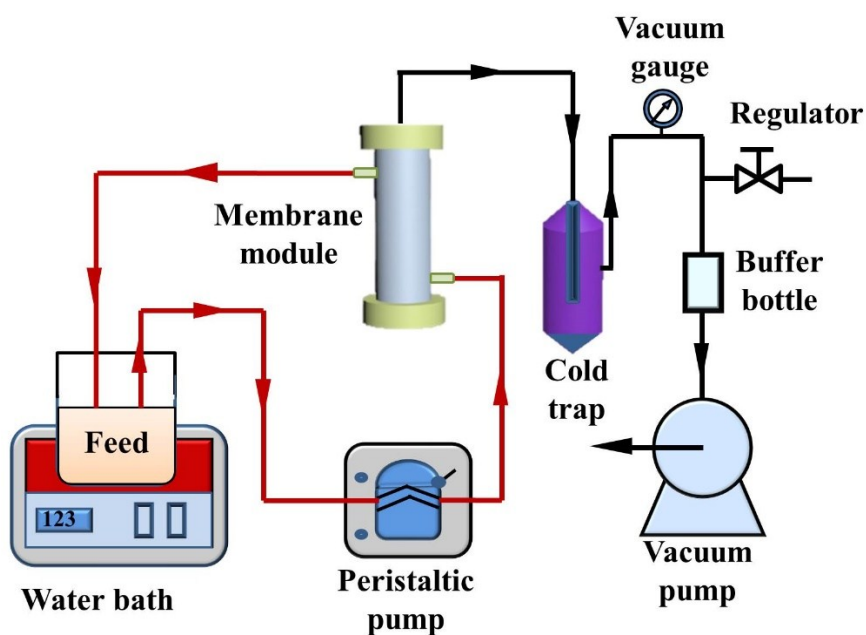

**Figure S16.** Schematic diagram of the pervaporation apparatus.

Table S1 Comparison with other membranes for water/organics separation

| Membranes | Organic | Feed | Temperature | Flux | Water in | Ref |
|-----------|---------|------|-------------|------|----------|-----|
|-----------|---------|------|-------------|------|----------|-----|



|                                            | solvents           | content<br>(wt.%) | (°C) | (g/m <sup>2</sup> h) | permeate<br>(wt.%) |      |
|--------------------------------------------|--------------------|-------------------|------|----------------------|--------------------|------|
| PVA                                        | Ethanol            | 90                | 40   | 410                  | 98.2               | [1]  |
| HPA/SA                                     | Ethanol            | 90                | 60   | 320                  | 99.11              | [2]  |
| PSF                                        | Ethanol            | 90                | 25   | 800                  | 98.73              | [3]  |
| DETA/<br>TMC                               | Ethanol            | 90                | 25   | 1220                 | 98.4               | [4]  |
| MPD/TMC                                    | Ethanol            | 85                | 50   | 1288                 | 87.6               | [5]  |
| PEI/<br>PVS <sub>60</sub>                  | Ethanol            | 79.4              | 58.5 | 600                  | 99.5               | [6]  |
| Nexar <sup>TM</sup> /<br>PEI               | Ethanol            | 85                | 50   | 1160                 | 95.8               | [7]  |
| (PAA/PEI) <sub>4</sub>                     | Ethanol            | 95                | 40   | 140                  | 98.45              | [8]  |
| m-Tolidine-<br>H-TMC/<br>PAN               | Ethanol            | 90                | 25   | 2191                 | 99.5               | [9]  |
| TDI cross-<br>MPD/TMC                      | Ethanol            | 85                | 50   | 2000                 | 95.8               | [10] |
| PVA/NR/<br>zeolite 4A                      | Ethanol            | 95                | 30   | 3600                 | 94                 | [11] |
| Poly(acrylo<br>nitrile butyl<br>acrylate)  | Acetic acid        | 99.5              | 30   | 3970                 | 99.84              | [12] |
| PVA/<br>zeolite 4A                         | Ethylene<br>glycol | 80                | 70   | 2800                 | 99.8               | [13] |
| CS/ZIF-7                                   | Ethanol            | 90                | 25   | 1206                 | 98.35              | [14] |
| CS/ OAS<br>POSS                            | Ethanol            | 90                | 30   | 37                   | 95.7               | [15] |
| Ultem <sup>R</sup> /pol<br>yimide/<br>POSS | Ethanol            | 90                | 60   | 1800                 | 94.7               | [16] |
| Cu <sub>3</sub> (BTC) <sub>2</sub>         | Isopropanol        | 90                | 50   | 400                  | 96.46              | [17] |
| P84/<br>Zeolite 13X                        | Isopropanol        | 90                | 60   | 110                  | 99.67              | [18] |
| PBI/ZIF-8                                  | Isopropanol        | 85                | 60   | 103                  | 99.6               | [19] |

|                                                 |                   |    |    |       |       |              |
|-------------------------------------------------|-------------------|----|----|-------|-------|--------------|
| PERVAP <sup>R</sup> 2<br>510 Dense<br>Zeolite T | Isopropanol       | 85 | 60 | 64.4  | 99.8  | [20]         |
| Zeolite T                                       | Ethanol           | 90 | 65 | 1770  | 99.2  | [21]         |
| Zeolite T                                       | Isopropanol       | 90 | 65 | 2150  | 100   | [21]         |
| Zeolite T                                       | Isopropanol       | 90 | 75 | 1100  | 99    | [22]         |
| Zeolite T                                       | Ethanol           | 90 | 75 | 2200  | 100   | [22]         |
| Zeolite T                                       | Ethanol           | 90 | 75 | 2120  | 99.3  | [23]         |
| Zeolite T                                       | Ethanol           | 90 | 75 | 2520  | 100   | [23]         |
| NaA/PES-<br>PI                                  | Isopropanol       | 90 | 75 | 11100 | 100   | [24]         |
| NaA/PES-<br>PI                                  | Ethanol           | 90 | 75 | 10600 | 100   | [25]         |
| NaY/<br>ceramic                                 | Isopropanol       | 90 | 75 | 2500  | 97.5  | [25]         |
| NaY/<br>ceramic                                 | <i>n</i> -Butanol | 95 | 75 | 2000  | 98.75 | [25]         |
| NaX                                             | Ethanol           | 90 | 75 | 1900  | 95    | [25]         |
| LDH                                             | Ethanol           | 90 | 75 | 1132  | 99.19 | This<br>work |
| LDH                                             | Propanol          | 90 | 75 | 3484  | 100   | This<br>work |
| LDH                                             | Isopropanol       | 90 | 75 | 2580  | 100   | This<br>work |
| LDH                                             | <i>n</i> -Butanol | 90 | 75 | 3200  | 100   | This<br>work |
| LDH                                             | Isobutanol        | 90 | 75 | 3300  | 100   | This<br>work |
| LDH                                             | Ethyl<br>acetate  | 90 | 75 | 4640  | 100   | This<br>work |

#### Supplementary references

1 V. T. Magalad, A. R. Supale, S. P. Maradur, G. S. Gokavi, T. M. Aminabhavi,

*Chem. Eng. J.*, 2010, **159**, 75-83.

- 2 S. Chen, K. Yu, S. Lin, D. Chang, R. Liu, *J. Membr. Sci.*, 2001, **183**, 29-36.
- 3 W. Chao, S. Huang, S. Wei, Y. Huang, K. Liao, C. Lai, H. Tsai, K. Lee, *J. Membr. Sci.*, 2013, **429**, 34-43.
- 4 Y. Zhang, N. Le, T. Chuang, Y. Wang, *Chem. Eng. Sci.*, 2014, **118**, 173-183.
- 5 L. Krasemann, A. Toutianoush, B. Tieke, *J. Membr. Sci.*, 2001, **181**, 221-228.
- 6 G. Shi, J. Zuo, S. Tang, S. Wei, T. Chuang, *Sep. Purif. Technol.*, 2015, **140**, 13-20.
- 7 G. Zhang, W. Gu, S. Ji, Z. Liu, Y. Peng, Z. Wang, *J. Membr. Sci.*, 2006, **280**, 727-733.
- 8 Y. Huang, S. Huang, W. Chao, C. Li, Y. Hsieh, W. Hung, D. Liaw, C. Hu, K. Lee, J. Lai, *Polym. Int.*, 2014, **63**, 1478-1486.
- 9 J. Zuo, J. Lai, T. Chuang, *J. Membr. Sci.*, 2014, **458**, 47-57.
- 10 S. Amnuaypanich, J. Patthana, P. Phinyocheep, *Chem. Eng. Sci.*, 2009, **64**, 4908-4918.
- 11 H. Samanta, S. Ray, P. Das, N. Singh, *J. Chem. Technol. Biotechnol.*, 2012, **87**, 608-622.
- 12 M. Shahverdi, B. Baheri, M. Rezakazemi, E. Motae, T. Mohammadi, *Polym. Eng. Sci.*, 2013, **53**, 1487-1493.
- 13 C. Kang, Y. Huang, K. Tung, K. Chang, J. Chen, W. Hung, K. Lee, J. Lai, *J. Membr. Sci.*, 2013, **438**, 105-111.
- 14 D. Xu, L. S. Loo, K. Wang, *J. Polym. Sci. Phys.*, 2010, **48**, 2185-2190.
- 15 N. Le, Y. Tang, T. Chuang, *J. Membr. Sci.*, 2013, **447**, 163-176.
- 16 S. Sorribas, A. Kudasheva, E. Almendro, *Chem. Eng. Sci.*, 2015, **124**, 37-44.

- 17 X. Qiao, T. Chung, *Chem. Eng. Sci.*, 2006, **61**, 6816-6825.
- 18 G. Shi, T. Yang, T. Chuang, *J. Membr. Sci.*, 2012, **415**, 577-586.
- 19 X. Qiao, T. Chuang, W. Guo, T. Matsuura, M. M. Teoh, *J. Membr. Sci.*, 2005, **252**, 37-49.
- 20 H. Zhou, Y. Li, G. Zhua, J. Liu, W. Yang, *Sep. Purif. Technol.*, 2009, **65**, 164-172.
- 21 Y. Cui, H. Kita, K. Okamoto, *J. Membr. Sci.*, 2004, **236**, 17-27.
- 22 X. Chen, J. Wang, D. Yin, J. Yang, J. Lu, Y. Zhang, *AIChE J.*, 2013, **59**, 936-947.
- 23 Z. Zhan, N. Ma, H. Yan, Y. Peng, Z. Wang, Y. Yan, *J. Membr. Sci.*, 2015, **485**, 94-102.
- 24 Z. Zhan, J. Shao, Y. Peng, Z. Wang, Y. Yan, *J. Membr. Sci.*, 2014, **471**, 299-307.
- 25 F. Zhang, L. Xu, N. Hu, N. Bu, R. Zhou, X. Chen, *Sep. Purif. Technol.*, 2014, **129**, 9-17.
